# Supplementary material for: Biopolymer based artificial synapses enable linear conductance tuning and low-power for neuromorphic computing
Source: Royal Society of Chemistry journal article supplement (doi:10.1039/d2nr01996e), 2022-01-01
Supplement: d2nr01996e1.pdf [file d2nr01996e1.pdf]

Supporting Information for

# **Biopolymer based artificial synapse enables linear conductance tuning and low-power for neuromorphic computing**

*Ke Zhang<sup>a</sup>, Qi Xue<sup>a</sup>, Chao Zhou<sup>b</sup>, Wanneng Mo<sup>c</sup>, Chun-Chao Chen<sup>a</sup>, Ming Li<sup>a</sup>, Tao Hang<sup>a,\*</sup>*

<sup>a</sup> State Key Laboratory of Metal Matrix Composites, School of Materials Science and Engineering Shanghai Jiao Tong University, Shanghai, 200240, China

<sup>b</sup> Key Laboratory of Thin Film and Microfabrication Technology (Ministry of Education), School of Electronics, Information and Electrical Engineering, Shanghai Jiao Tong University, Shanghai, 200240, China

<sup>c</sup> School of Mechanical Engineering, Shanghai Jiao Tong University, Shanghai, 200240, China

\* Corresponding author: [hangtao@sjtu.edu.cn](mailto:hangtao@sjtu.edu.cn)

## S1: Peak shifting and band assignments of both compounds

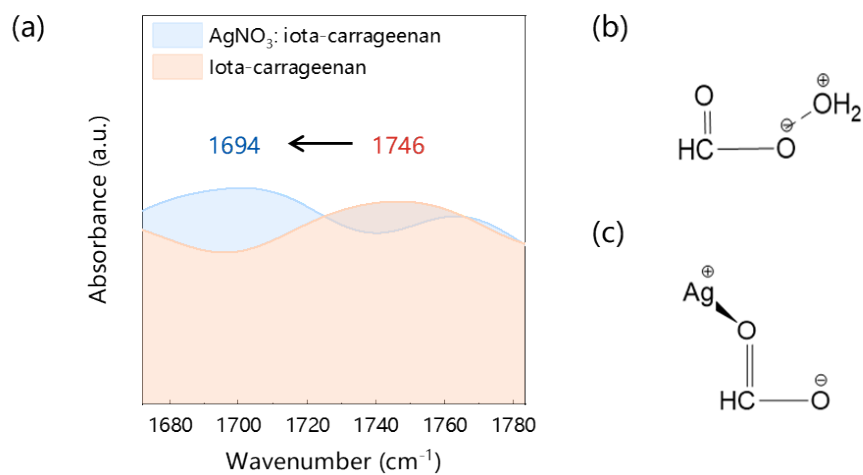

**Figure S1** (a) Enlarged FTIR spectra illustrating the peak at 1746 cm<sup>-1</sup> in the pristine carrageenan shifted to 1694 cm<sup>-1</sup> in the doped carrageenan due to C=O stretching mode transformation; (b) asymmetric stretching mode caused by electrostatic interactions; (c) symmetric stretching mode caused by ion dipole interactions between Ag ions and oxygen atoms in C=O

**Table S1** FTIR band assignments of modified carrageenan and native carrageenan thin film samples

| Peak NO. | Modified carrageenan (cm <sup>-1</sup> ) | Carrageenan (cm <sup>-1</sup> ) | Assignment                    |
|----------|------------------------------------------|---------------------------------|-------------------------------|
| 1        | 648                                      | 657                             | Skeleton bending              |
| 2        | 700                                      | 713                             | Skeleton bending              |
| 3        | 756                                      | 779                             | <i>d</i> -galactose           |
| 4        | 856                                      | 885                             | C-H stretching                |
| 5        | 1039                                     | 1049                            | C-O-C stretching              |
| 6        | 1231                                     | 1244                            | Sulphate ester                |
| 7        | 802                                      | -                               | NO <sub>2</sub> stretching    |
| 8        | 1694                                     | 1746                            | C=O stretching                |
| 9        | 2318, 2378                               | 2285, 2366                      | H <sub>3</sub> O <sup>+</sup> |

## S2: Nanopore's statistic distribution analysis

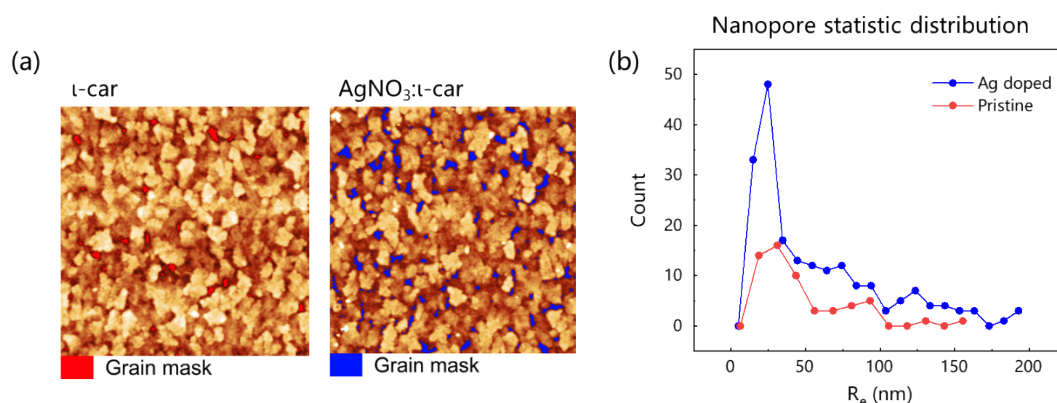

**Figure S2** (a) AFM images of ι-car and AgNO<sub>3</sub>: ι-car with nanopore(grain) masked by red and blue color, respectively; (b) statistic distribution of the number and minimum circumcircle radius ( $R_e$ ) of nanopores

The software Gwyddion was used to mark the nanopores' distribution under certain threshold conditions ( $>20\%$  in depth), count the number, and the Minimum circumcircle radius ( $R_e$ ) of nanopores. Here the parameter  $R_e$  meaning the radius of the minimum circle that contains the grain was used to evaluate the pore's size. **Figure S2 a** shows the processed AFM spectra of ι-car and Ag doped ι-car surfaces with the pores marked by red and blue color. The counting results given in **Figure S2b** demonstrate an apparent increase in pore counts and more concentrated pores' distribution in the Ag doped film. The porous structure which was reported to be able to confine the growth of metal filaments and therefore can stabilize the resistive switching process might play a similar role in our device.

## S3: The simulation of human brain forgetting behaviors

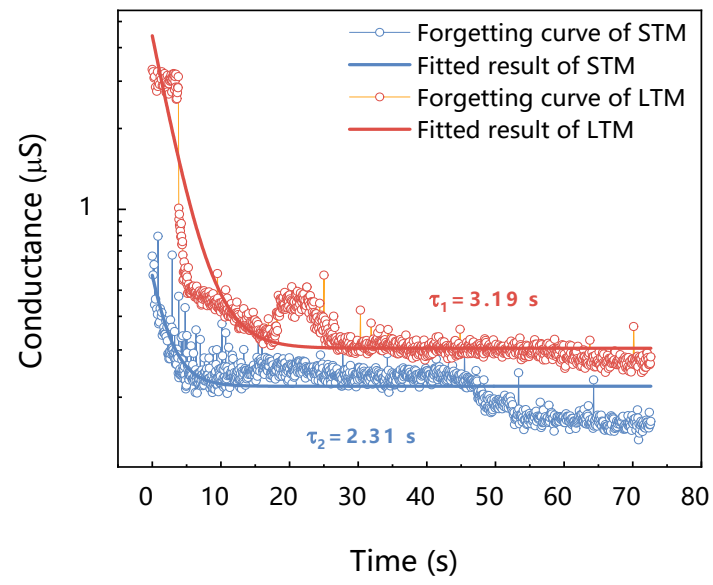

**Figure S3** The fitted results for long-term memory (LTM) and short-term memory (STM)

#### S4: Experimental and fitted potentiation-depression curves

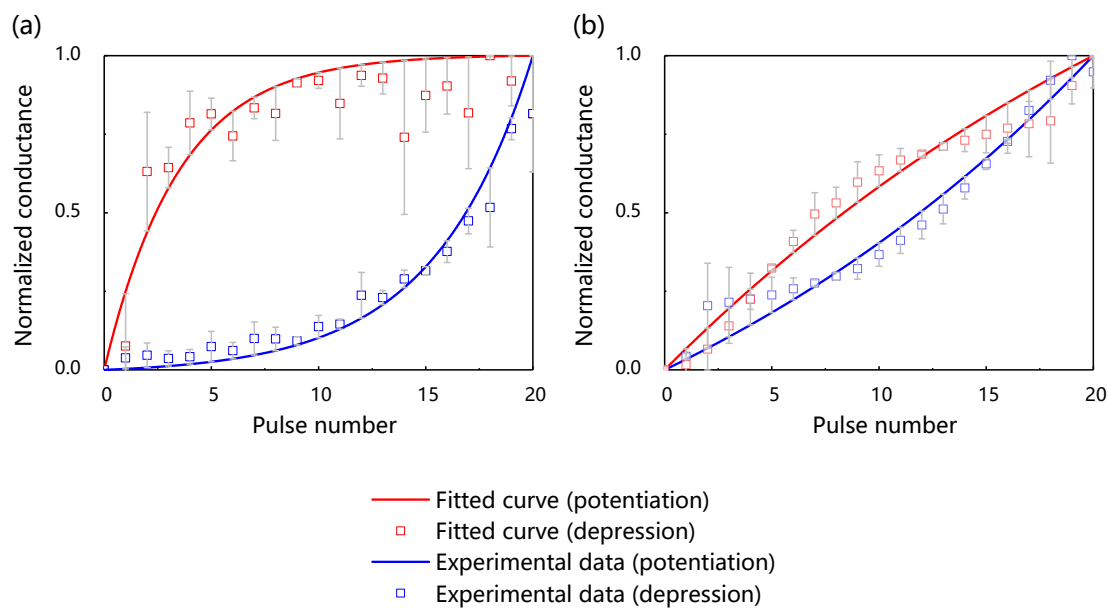

**Figure S4.** The experimental and fitted results of the potentiation-depression curve for  
a) undoped memristor and b) AgNO<sub>3</sub> doped memristor

### S5: Enlarged LTP and LTD curves

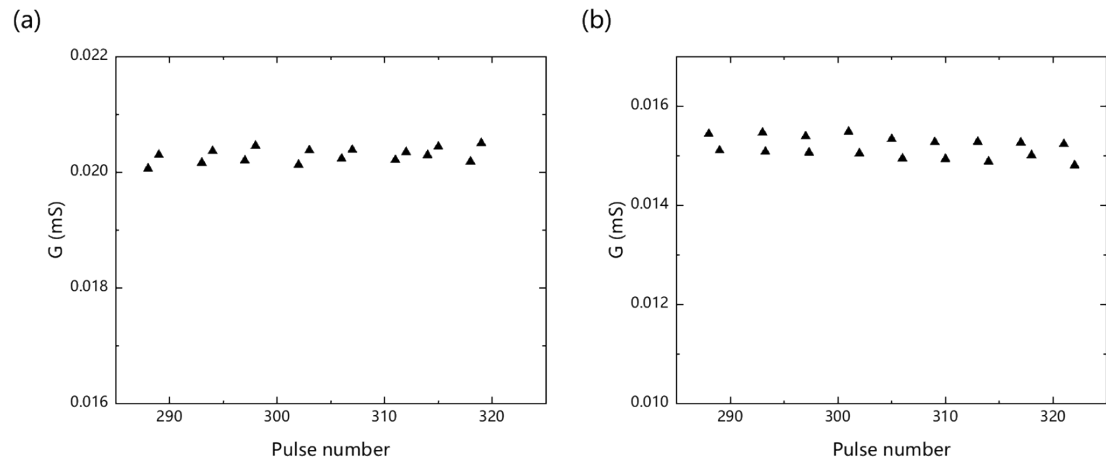

**Figure S5.** The enlarged potentiation-depression curve for a) LTP and b) LTD, indicating the temporal stability of conduction states over about 30 pulses
